# Supplementary material
Source: PubMed Central journal article supplement (PMC2963316)
Supplement: bc100275r_si_001.pdf [file bc100275r_si_001.pdf]

## SUPPLEMENTARY INFORMATION

### **Synthesis and splice-redirecting activity of branched, arginine-rich peptide dendrimer conjugates of Peptide Nucleic Acid oligonucleotides**

Amer Saleh<sup>†</sup>, Andrey Arzumanov<sup>†</sup>, Rachida Abes<sup>§</sup>, David Owen<sup>†</sup>, Bernard Lebleu<sup>§</sup> and Michael J. Gait<sup>†\*</sup>

| CONTENTS                                                                                                                                                 | Page |
|----------------------------------------------------------------------------------------------------------------------------------------------------------|------|
| <b>Supplementary Figure 1.</b> Reversed-phase HPLC traces and MALDI-TOF mass spectra of 3 branched peptides.                                             | 2-3  |
| <b>Supplementary Figure 2.</b> Reversed-phase HPLC traces and MALDI-TOF mass spectra of peptide-PNA705 conjugates.                                       | 4    |
| <b>Supplementary Figure 3.</b> Fold increase in luminescence in the luciferase assay for peptide-PNA705 conjugates in the presence or absence of 10% FBS | 5    |

**A**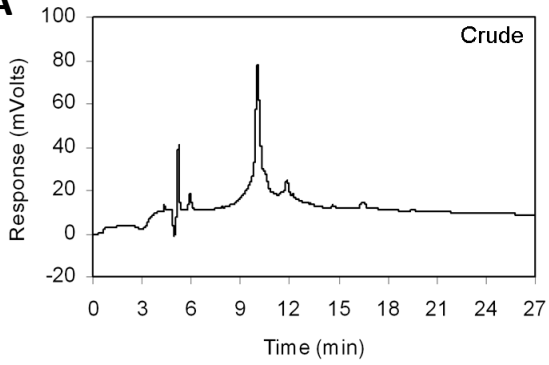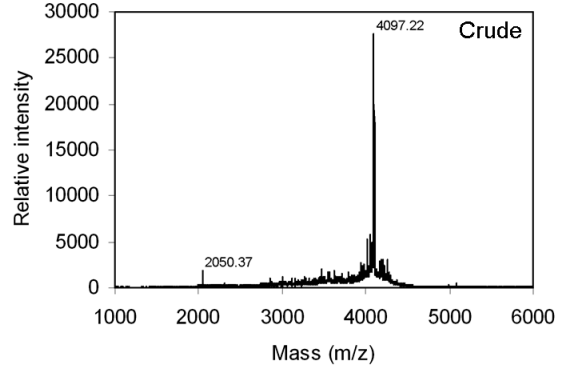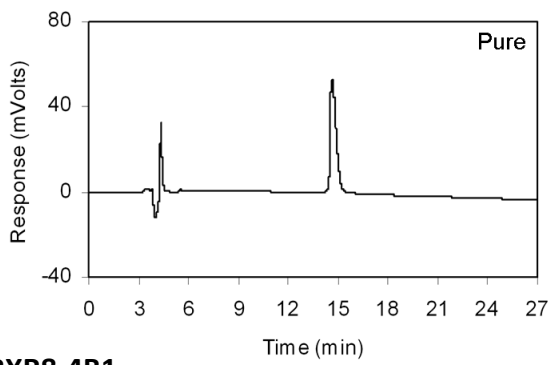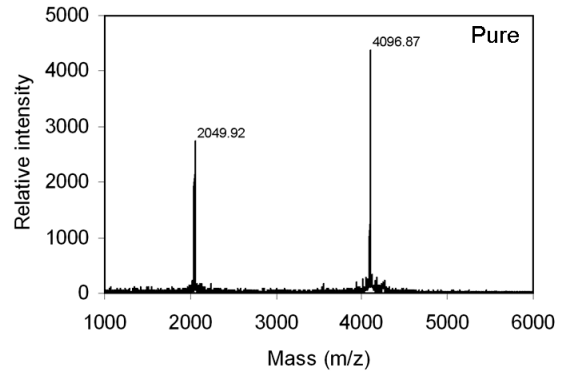**RXR8-4B1****B**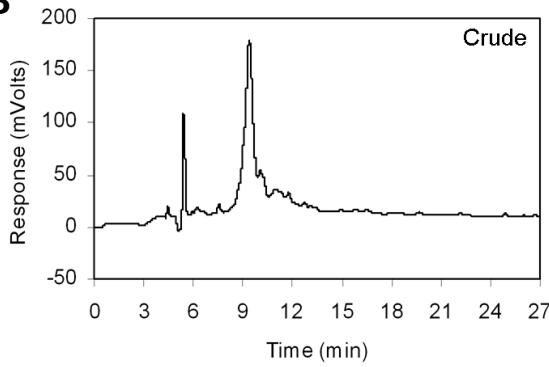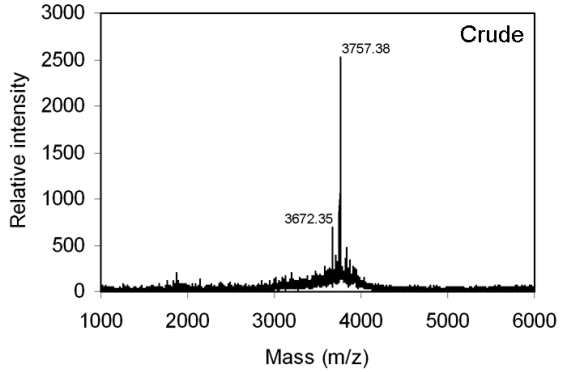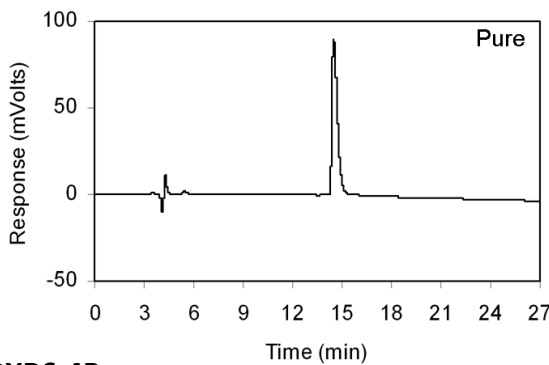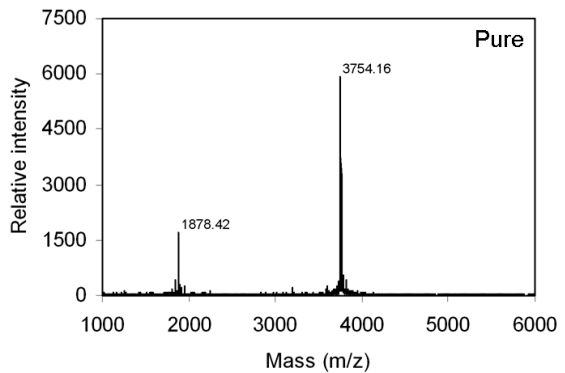**RXR6-4B**

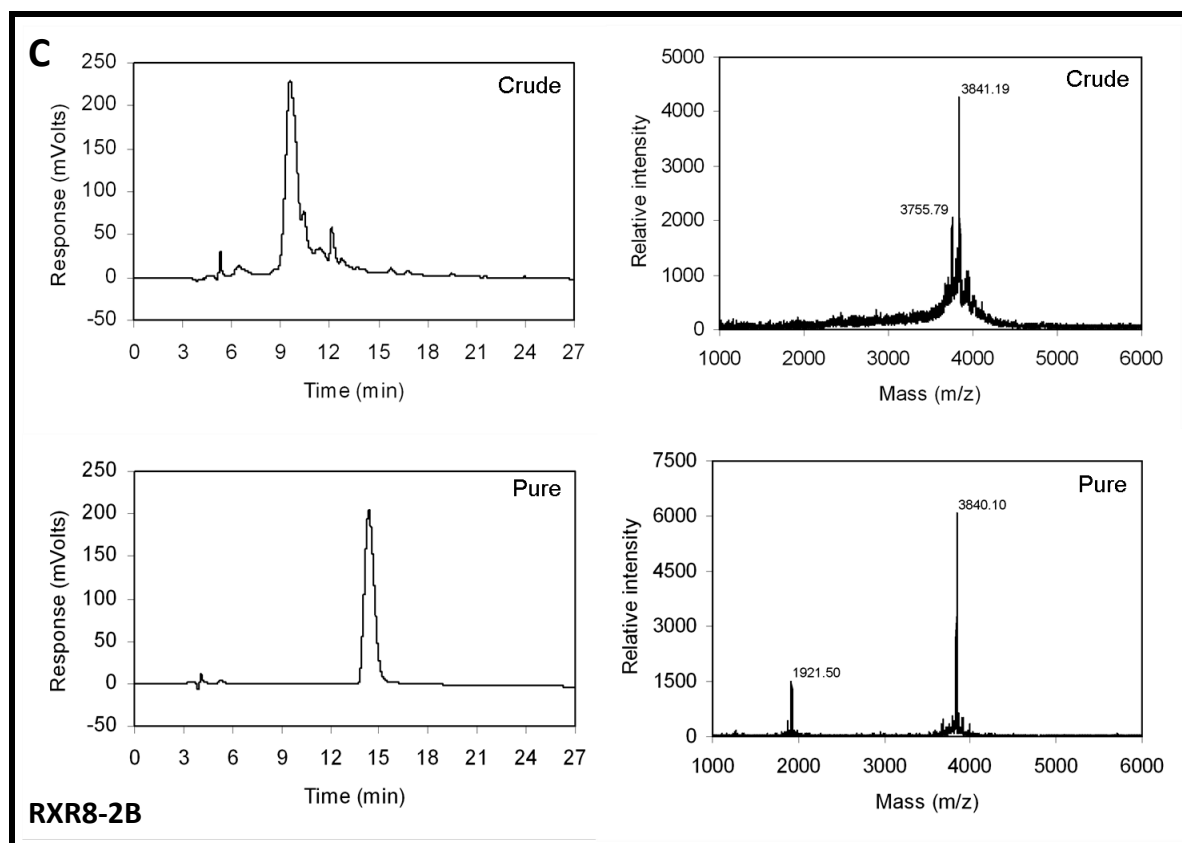

**Supplementary Figure 1.** HPLC traces (left) and MALDI-TOF mass spectra (right) of crude products and purified peptides (**A**) RXR8-4B1, (**B**) RXR6-4B and (**C**) RXR8-2B. Each crude peptide was purified by RP-HPLC on a 10 x 250 mm C18 column (buffer A: 0.1% TFA, buffer B: 90% acetonitrile, 10% solvent A) using 15-50% B in 25 minutes. The purified peptide was analysed by RP-HPLC on a 4.6 x 250 mm C18 column (buffer A: 0.1% TFA, buffer B: 90% acetonitrile, 10% solvent A) using 10-40% B in 25 minutes.

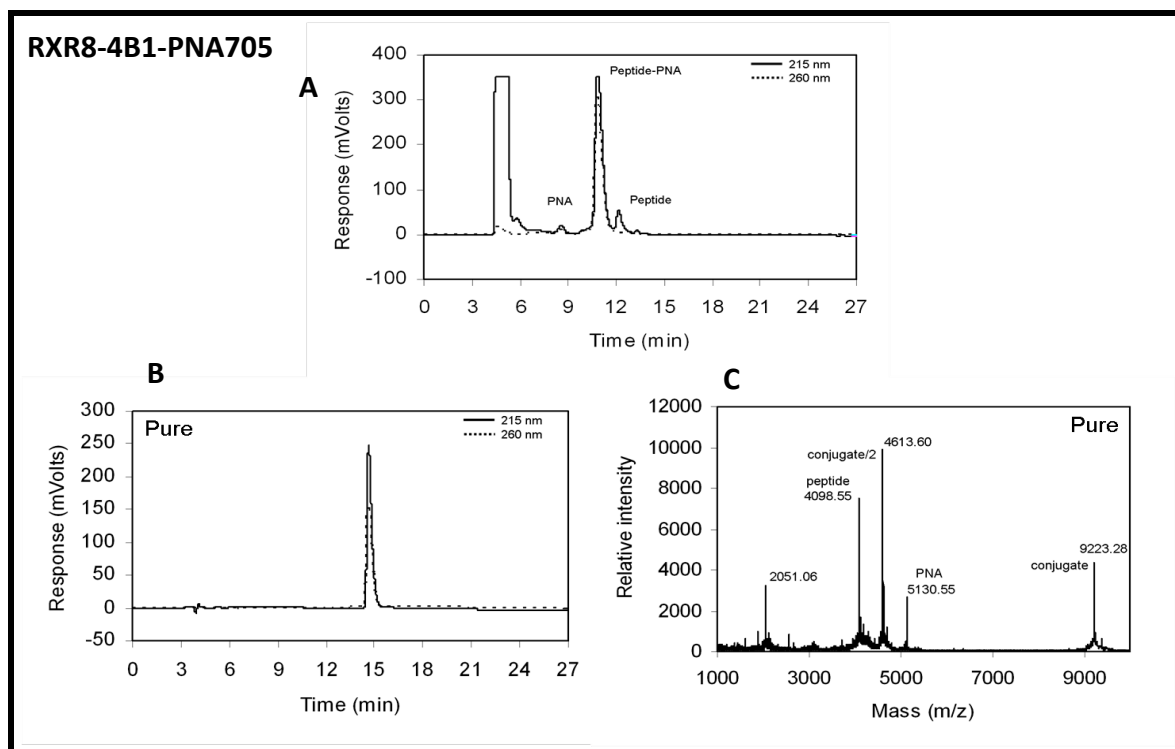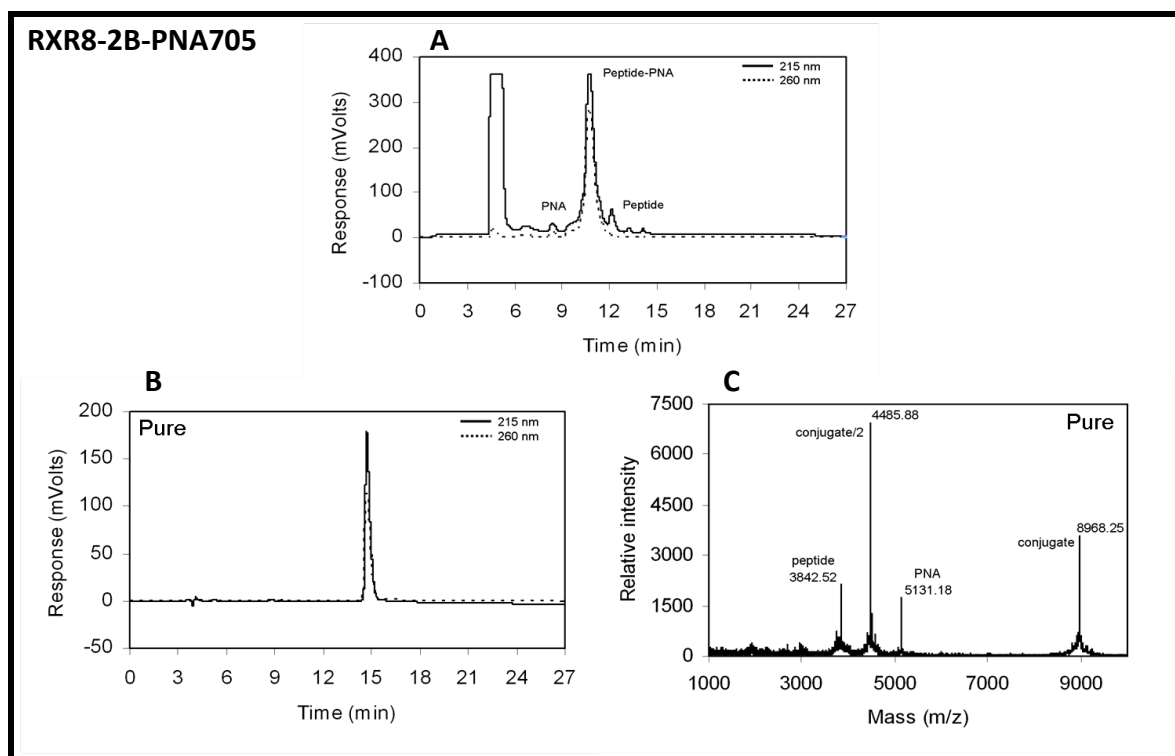

**Supplementary Figure 2.** Synthesis of conjugates RXR8-4B1-PNA705 (**Top panel**) and RXR8-2B-PNA705 (**Bottom panel**) **A)** Reversed-phase HPLC of crude products on a 10 x 250 mm C18 column (buffer A: 0.1% TFA, buffer B: 90% acetonitrile, 10% solvent A) using 15-40% B in 25 minutes. **(B)** Analysis of the purified conjugate by RP-HPLC on a 4.6 x 250 mm C18 column (buffer A: 0.1% TFA, buffer B: 90% acetonitrile, 10% solvent A) using 10-40% B in 25 minutes. **(C)** MALDI-TOF mass spectrum of the conjugate.

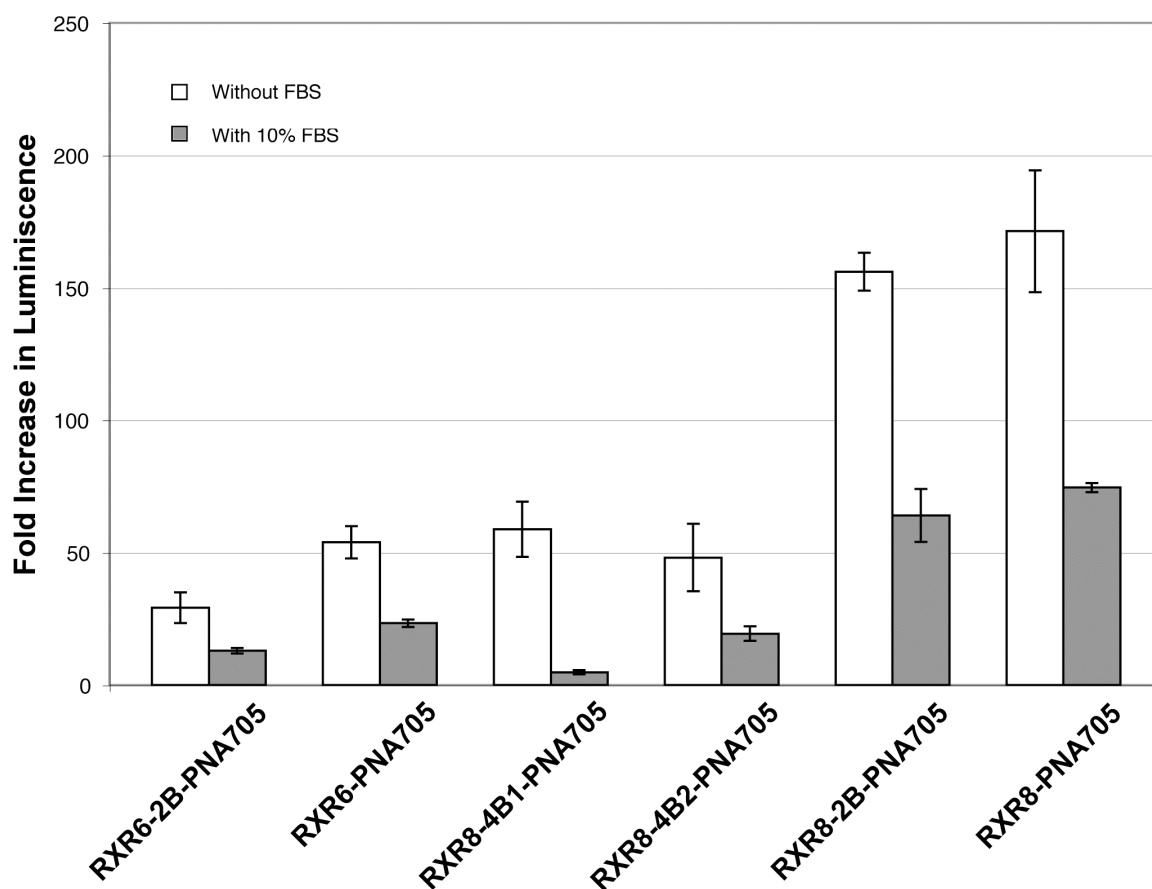

**Supplementary Figure 3.** Fold increase in luminescence obtained for selected peptide-PNA705 conjugates in the luciferase assay. Peptide-PNA conjugates (1.2  $\mu\text{M}$ ) were incubated for 4 h in 0.35 ml OptiMEM medium with exponentially growing HeLa pLuc705 cells ( $1.25 \times 10^5$  cells/well seeded and cultivated overnight) in 24 wells plates either with or without 10% fetal bovine serum (FBS). The medium was removed, 1 ml complete medium (DMEM plus 10% FBS) was added and incubation continued for 20 h. The luciferase assay was carried out as described in the Experimental Procedures.
